# Supplementary material for: In Silico Knockout Studies of Xenophagic Capturing of Salmonella
Source: PubMed Central journal article supplement (PMC5131900; doi:10.1371/journal.pcbi.1005200), 2016-12-01
Supplement: pcbi.1005200.s007.pdf [file pcbi.1005200.s007.pdf]

**S1 Table: Places (substances) of the Petri net.**

| Place (#60)                  | Description                                                         |
|------------------------------|---------------------------------------------------------------------|
| SCV                          | <i>Salmonella</i> containing vacuole                                |
| S-damagedSCV                 | <i>Salmonella</i> inside a damaged SCV                              |
| S-cyt                        | <i>Salmonella</i> inside the cytosol                                |
| Gal8 (2 logical places)      | Galectin-8                                                          |
| LRSAM1 (4 logical places)    | Ubiquitin ligase LRSAM1                                             |
| E3 ligase (4 logical places) | unknown E3 ligase or E3 ligases                                     |
| NDP52 (4 logical places)     | Autophagy receptor NDP52                                            |
| NDP52'                       | Technical place type 0 of NDP52-positive <i>Salmonella</i>          |
| NDP52'i                      | Technical place type i of NDP52-positive <i>Salmonella</i>          |
| OPTN (3 logical places)      | Autophagy receptor OPTN                                             |
| OPTN'                        | Technical place type 0 of OPTN-positive <i>Salmonella</i>           |
| OPTN'i                       | Technical place type i of OPTN-positive <i>Salmonella</i>           |
| p62 (3 logical places)       | Autophagy receptor p62                                              |
| p62'                         | Technical place type 0 of p62-positive <i>Salmonella</i>            |
| p62'i                        | Technical place type i of p62-positive <i>Salmonella</i>            |
| TBK1 (5 logical places)      | Kinase TBK1                                                         |
| diTBK1'                      | Technical place type 0 of dimeric TBK1-positive <i>Salmonella</i>   |
| diTBK1'i                     | Technical place type i of dimeric TBK1-positive <i>Salmonella</i>   |
| diTBK1'ii                    | Technical place type ii of dimeric TBK1-positive <i>Salmonella</i>  |
| diTBK1'iii                   | Technical place type iii of dimeric TBK1-positive <i>Salmonella</i> |
| N/S (5 logical places)       | Nap1 or Sintbad                                                     |
| N/S'                         | Technical place type 0 of Nap1/Sintbad-positive <i>Salmonella</i>   |
| N/S'i                        | Technical place type i of Nap1/Sintbad-positive <i>Salmonella</i>   |
| S:Gal8                       | Complex of <i>Salmonella</i> and galectin-8                         |
| S:Gal8:NDP52                 | Complex of <i>Salmonella</i> , galectin-8, and NDP52                |
| S:Gal8:Ub (3 logical places) | Complex of <i>Salmonella</i> , galectin-8, and ubiquitin            |
| S:Gal8:Ub:p62                | Complex of <i>Salmonella</i> , galectin-8, ubiquitin, and p62       |

|                                         |                                                                                                                                   |
|-----------------------------------------|-----------------------------------------------------------------------------------------------------------------------------------|
| S:Gal8:Ub:OPTN                          | Complex of <i>Salmonella</i> , galectin-8, ubiquitin, and OPTN                                                                    |
| S:Gal8:Ub:NDP52                         | Complex of <i>Salmonella</i> , galectin-8, ubiquitin, and NDP52                                                                   |
| S:Gal8:Ub:NDP52:N/S                     | Complex of <i>Salmonella</i> , galectin-8, ubiquitin, NDP52, and Nap1/Sintbad                                                     |
| S:Gal8:Ub:NDP52:OPTN:p62                | Complex of <i>Salmonella</i> , galectin-8, ubiquitin, NDP52, OPTN, and p62                                                        |
| S:Gal8:Ub:NDP52:OPTN:p62:N/S            | Complex of <i>Salmonella</i> , galectin-8, ubiquitin, NDP52, OPTN, p62, and Nap1/Sintbad                                          |
| S:Gal8:Ub:NDP52:OPTN:p62:N/S:diTBK1     | Complex of <i>Salmonella</i> , galectin-8, ubiquitin, NDP52, OPTN, p62, Nap1/Sintbad, and dimeric TBK1 type 0                     |
| S:Gal8:Ub:NDP52:OPTN:p62:N/S:diTBK1i    | Complex of <i>Salmonella</i> , galectin-8, ubiquitin, NDP52, OPTN, p62, Nap1/Sintbad, and dimeric TBK1 type i                     |
| S:Gal8:Ub:NDP52:OPTNp:p62:N/S:OligoTBK1 | Complex of <i>Salmonella</i> , galectin-8, ubiquitin, NDP52, phosphorylated OPTN, p62, Nap1/Sintbad, and oligomerized TBK1 dimers |
| S:Ub                                    | Complex of <i>Salmonella</i> and ubiquitin                                                                                        |
| S:Ub:p62                                | Complex of <i>Salmonella</i> , ubiquitin, and p62                                                                                 |
| S:Ub:OPTN                               | Complex of <i>Salmonella</i> , ubiquitin, and OPTN                                                                                |
| S:Ub:NDP52                              | Complex of <i>Salmonella</i> , ubiquitin, and NDP52                                                                               |
| S:Ub:NDP52:N/S                          | Complex of <i>Salmonella</i> , ubiquitin, NDP52, and Nap1/Sintbad                                                                 |
| S:Ub:NDP52:OPTN:p62                     | Complex of <i>Salmonella</i> , ubiquitin, NDP52, OPTN, and p62                                                                    |
| S:Ub:NDP52:OPTN:p62:N/S                 | Complex of <i>Salmonella</i> , ubiquitin, NDP52, OPTN, p62, and Nap1/Sintbad                                                      |
| S:Ub:NDP52:OPTN:p62:N/S:diTBK1          | Complex of <i>Salmonella</i> , ubiquitin, NDP52, OPTN, p62, Nap1/Sintbad, and dimeric TBK1                                        |
| S:Ub:NDP52:OPTN:p62:N/S:diTBK1i         | Complex of <i>Salmonella</i> , ubiquitin, NDP52, OPTN, p62, Nap1/Sintbad, and dimeric TBK1                                        |
| S:Ub:NDP52:OPTNp:p62:N/S:OligoTBK1      | Complex of <i>Salmonella</i> , ubiquitin, NDP52, phosphorylated OPTN, p62, Nap1/Sintbad, and oligomerized TBK1 dimers             |
| LC3/GABARAP                             | LC3/GABARAP                                                                                                                       |
| SignalSCVdamage                         | Technical place of the SCV damage                                                                                                 |
| AA                                      | Normal amino acid level                                                                                                           |
| AAstarvation                            | Amino acid starvation                                                                                                             |

|                                     |                                                                                                              |
|-------------------------------------|--------------------------------------------------------------------------------------------------------------|
| mTORC1:ULK1comp                     | Complex of active mTORC1 and the inactivated ULK1 complex                                                    |
| mTORC1:ULK1comp:SCV                 | Complex of active mTORC1 on the SCV and the inactivated ULK1 complex                                         |
| mTORC1inactive                      | inactivated mTORC1 (formed by mTOR, Raptor, and mLST8/ <i>GbetaL</i> )                                       |
| ULK1comp                            | activated ULK1 complex (formed by ULK1, FIP200, ATG13, and ATG101)                                           |
| SignalAutophagyInduction<br>Ap:Gal8 | Technical place of the xenophagy induction<br>Autophagosome, including galectin-8-positive <i>Salmonella</i> |
| Ap:Gal8:Ub:N/S                      | Autophagosome, including galectin-8-positive, ubiquitinated <i>Salmonella</i> , and Nap1/Sintbad             |
| Ap:Gal8:Ub                          | Autophagosome, including galectin-8-positive, ubiquitinated <i>Salmonella</i>                                |
| Ap:Ub                               | Autophagosome, including ubiquitinated <i>Salmonella</i>                                                     |
| Ap:Ub:N/S                           | Autophagosome, including ubiquitinated <i>Salmonella</i> , and Nap1/Sintbad                                  |
| Ap:Gal8:Ub:OPTNp                    | Autophagosome, including galectin-8-positive, ubiquitinated <i>Salmonella</i> , and phosphorylation of OPTN  |
| Ap:Ub:OPTNp                         | Autophagosome, including ubiquitinated <i>Salmonella</i> , and phosphorylation of OPTN                       |
