# Supplementary material for: In Silico Knockout Studies of Xenophagic Capturing of Salmonella
Source: PubMed Central journal article supplement (PMC5131900; doi:10.1371/journal.pcbi.1005200), 2016-12-01
Supplement: pcbi.1005200.s008.pdf [file pcbi.1005200.s008.pdf]

**S2 Table: Transitions (reactions) of the Petri net.**

| <b>Transition</b> | <b>Description</b>                                                                                                                        | <b>Reference</b>                                                                                |
|-------------------|-------------------------------------------------------------------------------------------------------------------------------------------|-------------------------------------------------------------------------------------------------|
| Inv               | Invasion of <i>Salmonella</i> into the epithelial cell                                                                                    | Gomes et al. 2014, Stolz et al. 2014                                                            |
| SCVdamage         | Disruption of the SCV                                                                                                                     | Beuzon et al. 2002, Brumell et al. 2002                                                         |
| T1                | Binding of galectin-8 to host glycans exposed on SCV                                                                                      | Thurston et al. 2012                                                                            |
| T2                | Binding of LRSAM1 and other unknown E3 ligases to galectin-8-positive <i>Salmonella</i> and ubiquitination of <i>Salmonella</i>           | Huett et al. 2012, Ng et al. 2011, Perrin et al. 2004                                           |
| T2i               | Binding of LRSAM1 and other unknown E3 ligases to galectin-8 and NDP52-positive <i>Salmonella</i> and ubiquitination of <i>Salmonella</i> | Huett et al. 2012, Ng et al. 2011, Perrin et al. 2004                                           |
| T3                | Recruitment of NDP52 to galectin-8 and/or ubiquitin-positive <i>Salmonella</i>                                                            | Thurston et al. 2009, Thurston et al. 2012, Li et al. 2013                                      |
| T3i               | Binding of NDP52 to galectin-8                                                                                                            | Thurston et al. 2012, Li et al. 2013                                                            |
| T4                | Complex formation of NDP52 to galectin-8 and/or ubiquitin-positive <i>Salmonella</i>                                                      | Thurston et al. 2009, Thurston et al. 2012, Li et al. 2013                                      |
| T5                | Recruitment of OPTN to ubiquitin and galectin-8-positive <i>Salmonella</i>                                                                | Wild et al. 2011                                                                                |
| T6                | Complex formation of OPTN to ubiquitin and galectin-8-positive <i>Salmonella</i>                                                          | Wild et al. 2011                                                                                |
| T7                | Recruitment of p62 to ubiquitin and galectin-8-positive <i>Salmonella</i>                                                                 | Zheng et al. 2009                                                                               |
| T8                | Complex formation of p62 to ubiquitin and galectin-8-positive <i>Salmonella</i>                                                           | Zheng et al. 2009                                                                               |
| T9                | Binding of the three autophagy receptors, p62, OPTN, and NDP52, to galectin-8 and ubiquitin-positive <i>Salmonella</i>                    | Zheng et al. 2009, Thurston et al. 2009, Wild et al. 2011, Thurston et al. 2012, Li et al. 2013 |
| T10               | Recruitment of Nap1/Sintbad to NDP52-positive <i>Salmonella</i>                                                                           | Thurston et al. 2009                                                                            |
| T10i              | Binding of Nap1/Sintbad to NDP52, p62 and OPTN-positive <i>Salmonella</i> complex                                                         | Thurston et al. 2009                                                                            |

|        |                                                                                                                                                                      |                                                                                              |
|--------|----------------------------------------------------------------------------------------------------------------------------------------------------------------------|----------------------------------------------------------------------------------------------|
| T11    | Complex formation of Nap1/Sintbad to NDP52-positive <i>Salmonella</i>                                                                                                | Thurston et al. 2009                                                                         |
| T12    | Binding of the autophagy receptors, p62 and OPTN, to galectin-8 and ubiquitin-positive <i>Salmonella</i> complex, including NDP52-Nap1/Sintbad complex               | Zheng et al. 2009, Wild et al. 2011                                                          |
| T13    | Recruitment of dimeric TBK1 type 0 to OPTN and NDP52 via Nap1/Sintbad                                                                                                | Ryzhakov et al. 2007, Thurston et al. 2009, Tu et al. 2013, Larabi et al. 2013               |
| T13i   | Recruitment of dimeric TBK1 type i to OPTN and NDP52 via Nap1/Sintbad                                                                                                | Ryzhakov et al. 2007, Thurston et al. 2009, Tu et al. 2013, Larabi et al. 2013               |
| T14    | Complex formation of dimeric TBK1 type 0 to OPTN and NDP52 via Nap1/Sintbad                                                                                          | Ryzhakov et al. 2007, Thurston et al. 2009, Tu et al. 2013, Larabi et al. 2013               |
| T14i   | Complex formation of dimeric TBK1 type i to OPTN and NDP52 via Nap1/Sintbad                                                                                          | Ryzhakov et al. 2007, Thurston et al. 2009, Tu et al. 2013, Larabi et al. 2013               |
| T15    | Oligomerization of TBK1 leads to autoactivation and phosphorylation of OPTN                                                                                          | Fujita et al. 2003, Ma et al. 2012, Shu et al. 2013, Larabi et al. 2013, Gleason et al. 2011 |
| T16    | Binding of the galectin-8-positive, ubiquitinated <i>Salmonella</i> complex including phosphorylated OPTN to LC3/GABARAP leads to autophagosome formation            | Birmingham et al. 2006, Morton et al. 2008, Wild et al. 2011, Rogov et al. 2013              |
| T16i   | Binding of the galectin-8-positive, ubiquitinated <i>Salmonella</i> complex including the NDP52-Nap1/Sintbad complex to LC3/GABARAP leads to autophagosome formation | Birmingham et al. 2006                                                                       |
| T16ii  | Binding of the galectin-8-positive, ubiquitinated <i>Salmonella</i> complex to LC3/GABARAP leads to autophagosome formation                                          | Birmingham et al. 2006                                                                       |
| T16iii | Binding of the galectin-8-positive <i>Salmonella</i> complex to LC3/GABARAP leads to autophagosome formation                                                         | Birmingham et al. 2006, Thurston et al. 2012, Li et al. 2013                                 |
| T17    | <i>Salmonella</i> escape from the damaged SCV                                                                                                                        | Birmingham et al. 2006, Yu et al. 2014                                                       |

|      |                                                                                                                                         |                                                                                                 |
|------|-----------------------------------------------------------------------------------------------------------------------------------------|-------------------------------------------------------------------------------------------------|
| T18  | Binding of LRSAM1 to cytosolic <i>Salmonella</i> and ubiquitination of <i>Salmonella</i>                                                | Huett et al. 2012, Ng et al. 2011, Perrin et al. 2004                                           |
| T19  | Recruitment of p62 to ubiquitin-positive <i>Salmonella</i>                                                                              | Zheng et al. 2009                                                                               |
| T20  | Complex formation of p62 to ubiquitin-positive <i>Salmonella</i>                                                                        | Zheng et al. 2009                                                                               |
| T21  | Recruitment of OPTN to ubiquitin-positive <i>Salmonella</i>                                                                             | Wild et al. 2011                                                                                |
| T22  | Complex formation of OPTN to ubiquitin-positive <i>Salmonella</i>                                                                       | Wild et al. 2011                                                                                |
| T23  | Recruitment of NDP52 to ubiquitin-positive <i>Salmonella</i>                                                                            | Thurston et al. 2009                                                                            |
| T24  | Complex formation of NDP52 to ubiquitin-positive <i>Salmonella</i>                                                                      | Thurston et al. 2009                                                                            |
| T25  | Binding of the three autophagy receptors, p62, OPTN, and NDP52, to ubiquitin-positive <i>Salmonella</i>                                 | Zheng et al. 2009, Thurston et al. 2009, Wild et al. 2011, Thurston et al. 2012, Li et al. 2013 |
| T26  | Recruitment of Nap1/Sintbad to NDP52-positive cytosolic <i>Salmonella</i>                                                               | Thurston et al. 2009                                                                            |
| T26i | Binding of Nap1/Sintbad to NDP52-positive cytosolic <i>Salmonella</i>                                                                   | Thurston et al. 2009                                                                            |
| T27  | Complex formation of Nap1/Sintbad to NDP52-positive cytosolic <i>Salmonella</i>                                                         | Thurston et al. 2009                                                                            |
| T28  | Binding of the autophagy receptors, p62 and OPTN, to ubiquitin-positive <i>Salmonella</i> complex, including NDP52-Nap1/Sintbad complex | Zheng et al. 2009, Wild et al. 2011                                                             |
| T29  | Recruitment of dimeric TBK1 type 0 to OPTN and NDP52-positive cytosolic <i>Salmonella</i> via Nap1/Sintbad                              | Ryzhakov et al. 2007, Thurston et al. 2009, Tu et al. 2013, Larabi et al. 2013                  |
| T29' | Recruitment of dimeric TBK1 type i to OPTN and NDP52-positive cytosolic <i>Salmonella</i> via Nap1/Sintbad                              | Ryzhakov et al. 2007, Thurston et al. 2009, Tu et al. 2013, Larabi et al. 2013                  |
| T30  | Complex formation of dimeric TBK1 type 0 to OPTN and NDP52-positive cytosolic <i>Salmonella</i> via Nap1/Sintbad                        | Ryzhakov et al. 2007, Thurston et al. 2009, Tu et al. 2013, Larabi et al. 2013                  |

|        |                                                                                                                                                      |                                                                                            |
|--------|------------------------------------------------------------------------------------------------------------------------------------------------------|--------------------------------------------------------------------------------------------|
| T30'   | Complex formation of dimeric TBK1 type i to OPTN and NDP52-positive cytosolic <i>Salmonella</i> via Nap1/Sintbad                                     | Ryzhakov et al. 2007, Thurston et al. 2009, Tu et al. 2013, Larabi et al. 2013             |
| T31    | Oligomerization of TBK1 leads to autoactivation and phosphorylation of OPTN at cytosolic <i>Salmonella</i>                                           | Fujita et al. 2003, Ma et al.2012, Shu et al.2013, Larabi et al. 2013, Gleason et al. 2011 |
| T32    | Binding of ubiquitinated <i>Salmonella</i> complex including phosphorylated OPTN to LC3/GABARAP leads to autophagosome formation                     | Morton et al. 2008, Wild et al. 2011, Rogov et al. 2013                                    |
| T32i   | Binding of ubiquitinated <i>Salmonella</i> complex including the NDP52-Nap1/Sintbad complex to LC3/GABARAP leads to autophagosome formation          | Birmingham et al. 2006                                                                     |
| T32ii  | Binding of ubiquitinated <i>Salmonella</i> complex to LC3/GABARAP leads to autophagosome formation                                                   | Birmingham et al. 2006                                                                     |
| T33    | AA starvation is triggered by SCV damage                                                                                                             | Tattoli et al. 2012_1, Tattoli et al. 2012_2                                               |
| T34    | AA starvation leads to the inactivation of mTORC1 and its dissociation of the ULK1 complex                                                           | Tattoli et al. 2012_1, Tattoli et al. 2012_2, Mizushima 2010                               |
| T35    | Normalization of the AA level leads to mTORC1 reactivation and mTORC1 localizes to the surface of the SCV, resulting in inactivation of ULK1 complex | Tattoli et al. 2012_1, Tattoli et al. 2012_2, Mizushima 2010                               |
| T36    | Activated ULK1 complex induces xenophagy                                                                                                             | Mizushima 2010                                                                             |
| T37    | Activated ULK1 complex induces formation of phagophores                                                                                              | Mizushima 2010                                                                             |
| Deg1   | Degradation of the autophagosome through fusion with lysosome (output transition)                                                                    | Gomes et al. 2014, Stolz et al. 2014                                                       |
| Deg2   | Degradation of the autophagosome through fusion with lysosome (output transition)                                                                    | Gomes et al. 2014, Stolz et al. 2014                                                       |
| Deg2i  | Degradation of the autophagosome through fusion with lysosome (output transition)                                                                    | Gomes et al. 2014, Stolz et al. 2014                                                       |
| Deg2ii | Degradation of the autophagosome through fusion with lysosome (output transition)                                                                    | Gomes et al. 2014, Stolz et al. 2014                                                       |

|        |                                                                                        |                                      |
|--------|----------------------------------------------------------------------------------------|--------------------------------------|
| Deg3   | Degradation of the autophagosome through fusion with lysosome (output transition)      | Gomes et al. 2014, Stolz et al. 2014 |
| Deg3i  | Degradation of the autophagosome through fusion with lysosome (output transition)      | Gomes et al. 2014, Stolz et al. 2014 |
| Deg3ii | Degradation of the autophagosome through fusion with lysosome (output reaction)        | Gomes et al. 2014, Stolz et al. 2014 |
| Output | Technical output transition (output transition)                                        |                                      |
| Syn1   | Synthesis of galectin-8 (input transition)                                             |                                      |
| Syn2   | Synthesis of ubiquitin (input transition)                                              |                                      |
| Syn3   | Synthesis of LRSAM1 or other E3-ligases (input transition)                             |                                      |
| Syn4   | Synthesis of p62 (input transition)                                                    |                                      |
| Syn5   | Synthesis of NDP52 (input transition)                                                  |                                      |
| Syn6   | Synthesis of OPTN (input transition)                                                   |                                      |
| Syn7   | Synthesis of TLR4 (input reaction)                                                     |                                      |
| Syn8   | Synthesis of TBK1 (input transition)                                                   |                                      |
| Syn9   | Complex formation of active mTORC1 and the inactivated ULK1 complex (input transition) | Mizushima 2010                       |
