# Supplementary material for: In Silico Knockout Studies of Xenophagic Capturing of Salmonella
Source: PubMed Central journal article supplement (PMC5131900; doi:10.1371/journal.pcbi.1005200), 2016-12-01
Supplement: pcbi.1005200.s009.pdf [file pcbi.1005200.s009.pdf]

**S3 Table: T-invariants of the Petri net.**

| <b>T-invariant ID (Size)</b> | <b>Transitions (Reactions)</b>                                                                                                                                                             | <b>Biological Meaning</b>                                                                                                        |
|------------------------------|--------------------------------------------------------------------------------------------------------------------------------------------------------------------------------------------|----------------------------------------------------------------------------------------------------------------------------------|
| TI1 (15)                     | Inv, T1, SCVdamage, T16iii, Deg1, T35, Syn1, T3i, T33, T36, Syn5, T37, T34, Syn9, Output                                                                                                   | Galectin-8-dependent xenophagy of <i>Salmonella</i> inside a damaged SCV.                                                        |
| TI2 (37)                     | Inv, SCVdamage, T1, Syn1, T35, T3i, T33, T6, T8, T36, Syn7, Syn5, Syn6, T2i, T34, T7, T5, T13, Deg2, T16, Syn4, Syn3, T14, T13i, Syn2, T37, T14i, T15, 4*Syn8, T10, Syn9, T11, T12, Output | Galectin-8 and ubiquitin-dependent xenophagy of <i>Salmonella</i> inside a damaged SCV, including phosphorylation of OPTN.       |
| TI3 (37)                     | Inv, SCVdamage, T1, T9, Syn1, T35, T4, T3i, T33, T6, T8, T36, Syn7, Syn5, Syn6, T2i, T34, T7, T5, T10i, T13, Deg2, T16, Syn4, Syn3, T14, T13i, Syn2, T37, T14i, T15, 4*Syn8, Syn9, Output  | Galectin-8 and ubiquitin-dependent xenophagy of <i>Salmonella</i> inside a damaged SCV, including phosphorylation of OPTN.       |
| TI4 (37)                     | Inv, SCVdamage, T1, T9, Syn1, T35, T4, T33, T6, T8, T36, Syn7, Syn5, Syn6, T34, T2, T3, T7, T5, T10i, T13, Deg2, T16, Syn4, Syn3, T14, T13i, Syn2, T37, T14i, T15, 4*Syn8, Syn9, Output    | Galectin-8 and ubiquitin-dependent xenophagy of <i>Salmonella</i> inside a damaged SCV, including phosphorylation of OPTN.       |
| TI5 (37)                     | Inv, SCVdamage, T1, Syn1, T35, T33, T6, T8, T36, Syn7, Syn5, Syn6, T34, T2, T3, T7, T5, T13, Deg2, T16, Syn4, Syn3, T14, T13i, Syn2, T37, T14i, T15, 4*Syn8, T10, Syn9, T11, T12, Output   | Galectin-8 and ubiquitin-dependent xenophagy of <i>Salmonella</i> inside a damaged SCV, including phosphorylation of OPTN.       |
| TI6 (28)                     | Inv, SCVdamage, T1, T9, Syn1, T35, T4, T3i, T33, T6, T8, T36, Syn7, Syn5, Syn6, T2i, T34, T7, T5, T10i, Syn4, Syn3, Syn2, T37, Syn9, T16i, Deg2i, Output                                   | Galectin-8 and ubiquitin-dependent xenophagy of <i>Salmonella</i> inside a damaged SCV, including Nap1/Sintbad binding to NDP52. |
| TI7 (28)                     | Inv, SCVdamage, T1, Syn1, T35, T3i, T33, T6, T8, T36, Syn7, Syn5, Syn6, T2i, T34, T7, T5, Syn4, Syn3, Syn2, T37, T10, Syn9, T11, T16i, Deg2i, T12, Output                                  | Galectin-8 and ubiquitin-dependent xenophagy of <i>Salmonella</i> inside a damaged SCV, including Nap1/Sintbad binding to NDP52. |

|           |                                                                                                                                                                                            |                                                                                                                                  |
|-----------|--------------------------------------------------------------------------------------------------------------------------------------------------------------------------------------------|----------------------------------------------------------------------------------------------------------------------------------|
| TI8 (28)  | Inv, SCVdamage, T1, Syn1, T35, T33, T6, T8, T36, Syn7, Syn5, Syn6, T34, T2, T3, T7, T5, Syn4, Syn3, Syn2, T37, T10, Syn9, T11, T16i, Deg2i, T12, Output                                    | Galectin-8 and ubiquitin-dependent xenophagy of <i>Salmonella</i> inside a damaged SCV, including Nap1/Sintbad binding to NDP52. |
| TI9 (28)  | Inv, SCVdamage, T1, T9, Syn1, T35, T4, T33, T6, T8, T36, Syn7, Syn5, Syn6, T34, T2, T3, T7, T5, T10i, Syn4, Syn3, Syn2, T37, Syn9, T16i, Deg2i, Output                                     | Galectin-8 and ubiquitin-dependent xenophagy of <i>Salmonella</i> inside a damaged SCV, including Nap1/Sintbad binding to NDP52. |
| TI10 (26) | Inv, SCVdamage, T1, T9, Syn1, T35, T4, T33, T6, T8, T36, Syn5, Syn6, T34, T2, T3, T7, T5, Syn4, Syn3, T37, Syn2, T16ii, Syn9, Deg2ii, Output                                               | Galectin-8 and ubiquitin-dependent xenophagy of <i>Salmonella</i> inside a damaged SCV.                                          |
| TI11 (26) | Inv, SCVdamage, T1, T9, Syn1, T35, T4, T3i, T33, T6, T8, T36, Syn5, Syn6, T2i, T34, T7, T5, Syn4, Syn3, T37, Syn2, T16ii, Syn9, Deg2ii, Output                                             | Galectin-8 and ubiquitin-dependent xenophagy of <i>Salmonella</i> inside a damaged SCV.                                          |
| TI12 (25) | Inv, SCVdamage, T35, T33, T24, T22, T18, T20, T36, Syn5, Syn6, T25, T34, Deg3ii, T32ii, T21, T23, T19, Syn4, Syn3, T17, Syn2, T37, Syn9, Output                                            | Ubiquitin-dependent xenophagy of <i>Salmonella</i> inside the cytosol.                                                           |
| TI13 (27) | Inv, SCVdamage, T35, Deg3i, T33, T22, T20, T18, T36, Syn7, Syn5, Syn6, T34, T32i, T21, T23, T19, Syn4, Syn3, T26, T17, T37, Syn2, T27, Syn9, T28, Output                                   | Ubiquitin-dependent xenophagy of <i>Salmonella</i> inside the cytosol, including Nap1/Sintbad binding to NDP52.                  |
| TI14 (27) | Inv, SCVdamage, T35, Deg3i, T33, T24, T22, T20, T18, T36, Syn7, Syn5, T26i, Syn6, T25, T34, T32i, T21, T23, T19, Syn4, Syn3, T17, Syn2, T37, Syn9, Output                                  | Ubiquitin-dependent xenophagy of <i>Salmonella</i> inside the cytosol, including Nap1/Sintbad binding to NDP52.                  |
| TI15 (36) | Inv, SCVdamage, T35, Deg3, T33, T22, T20, T18, T36, Syn7, T29, Syn5, Syn6, T32, T34, T30', T31, T29', T30, T21, T23, T19, Syn4, Syn3, T17, T26, Syn2, T37, T27, 4*Syn8, Syn9, T28, Output  | Ubiquitin-dependent xenophagy of <i>Salmonella</i> inside the cytosol, including phosphorylation of OPTN.                        |
| TI16 (36) | Inv, SCVdamage, T35, Deg3, T33, T24, T22, T20, T18, T36, Syn7, T29, Syn5, T26i, Syn6, T25, T32, T34, T30', T31, T29', T30, T21, T23, T19, Syn4, Syn3, T17, Syn2, T37, 4*Syn8, Syn9, Output | Ubiquitin-dependent xenophagy of <i>Salmonella</i> inside the cytosol, including phosphorylation of OPTN.                        |
