# Supplementary material for: In Silico Knockout Studies of Xenophagic Capturing of Salmonella
Source: PubMed Central journal article supplement (PMC5131900; doi:10.1371/journal.pcbi.1005200), 2016-12-01
Supplement: pcbi.1005200.s010.pdf [file pcbi.1005200.s010.pdf]

**S4 Table: P-invariants of the Petri net.**

| <b>P-invariant ID (Size)</b> | <b>Places (Species)</b>                                                                                                                                                                                                                                                                                                                                                                                                                                                                                                                 | <b>Biological Meaning</b>                |
|------------------------------|-----------------------------------------------------------------------------------------------------------------------------------------------------------------------------------------------------------------------------------------------------------------------------------------------------------------------------------------------------------------------------------------------------------------------------------------------------------------------------------------------------------------------------------------|------------------------------------------|
| PI1 (27)                     | Ap:Ub, S:Ub:NDP52:OPTN:p62:N/S:OligoTBK1, S:Ub:NDP52:OPTN:p62:N/S:diTBK1i, S:Ub:NDP52:OPTN:p62:N/S:diTBK1, NDP52', S:Gal8:Ub:NDP52, Ap:Ub:OPTNp, Ap:Ub:N/S, S:Gal8:NDP52, S:Ub:NDP52:OPTN:p62:N/S, S:Gal8:NDP52:Ub:OPTN:p62:N/S, S:Ub:NDP52:OPTN:p62, S:Gal8:Ub:NDP52:OPTN:p62, Ap:Gal8:Ub:OPTNp, Ap:Gal8, S:Ub:NDP52, S:Gal8:Ub:NDP52:p62:OPTNp:N/S:OligoTBK1, S:Ub:NDP52:N/S, NDP52, N/S'i, S:Gal8:Ub:NDP52:OPTN:p62:N/S:diTBK1, NDP52'i, S:Gal8:Ub:NDP52:OPTN:p62:N/S:diTBK1i, Ap:Gal8:Ub:N/S, Ap:Gal8:Ub, S:Gal8:Ub:NDP52:N/S, N/S' | Conservation of NDP52                    |
| PI2 (21)                     | Ap:Ub, Ap:Gal8:Ub:OPTNp, S:Ub:OPTN, S:NDP52:Ub:OPTN:p62:N/S:OligoTBK1, S:NDP52:Ub:OPTN:p62:N/S:diTBK1i, S:NDP52:Ub:OPTN:p62:N/S:diTBK1, OPTN'i, S:Gal8:NDP52:Ub:p62:OPTNp:N/S:OligoTBK1, Ap:Ub:OPTNp, OPTN', Ap:Ub:N/S, S:Gal8:NDP52:Ub:OPTN:p62:N/S:diTBK1, OPTN, S:Gal8:NDP52:Ub:OPTN:p62:N/S, S:NDP52:Ub:OPTN:p62:N/S, S:Gal8:Ub:OPTN S:NDP52:Ub:OPTN:p62, S:Gal8:NDP52:Ub:OPTN:p62, S:Gal8:NDP52:Ub:OPTN:p62:N/S:diTBK1i, Ap:Gal8:Ub:N/S, Ap:Gal8:Ub                                                                                | Conservation of OPTN                     |
| PI3 (3)                      | AA, mTORC1inactive, AAstarvation                                                                                                                                                                                                                                                                                                                                                                                                                                                                                                        | Conservation of the AA starvation signal |
| PI4 (4)                      | SignalAutophagyInduction, mTORC1:ULK1comp:SCV, ULK1comp, mTORC1:ULK1comp                                                                                                                                                                                                                                                                                                                                                                                                                                                                | Conservation of the ULK1 complex         |
| PI5 (17)                     | Ap:Gal8:Ub:OPTNp, Ap:Gal8, Gal8, S:Gal8:Ub:NDP52, S:Gal8, S:Gal8:Ub:p62, S:Gal8:NDP52:Ub:p62:OPTNp:N/S:OligoTBK1, S:Gal8:NDP52, S:Gal8:NDP52:Ub:OPTN:p62:N/S:diTBK1, S:Gal8:Ub, S:Gal8:NDP52:Ub:OPTN:p62:N/S, S:Gal8:Ub:OPTN, S:Gal8:NDP52:Ub:OPTN:p62, S:Gal8:NDP52:Ub:OPTN:p62:N/S:diTBK1i, Ap:Gal8:Ub:N/S, Ap:Gal8:Ub, S:Gal8:Ub:NDP52:N/S                                                                                                                                                                                           | Conservation of galectin-8               |

|          |                                                                                                                                                                                                                                                                                                                                                                                                                                                                                                                                                                    |                                          |
|----------|--------------------------------------------------------------------------------------------------------------------------------------------------------------------------------------------------------------------------------------------------------------------------------------------------------------------------------------------------------------------------------------------------------------------------------------------------------------------------------------------------------------------------------------------------------------------|------------------------------------------|
| PI6 (27) | <p>Ap:Ub, S:NDP52:Ub:OPTN:p62:N/S:OligoTBK1, S:NDP52:Ub:OPTN:p62:N/S:diTBK1i, S:NDP52:Ub:OPTN:p62:N/S:diTBK1, S:Gal8:Ub:NDP52, LRSAM1, S:Gal8:Ub:p62, Ap:Ub:OPTNp, Ap:Ub:N/S, S:Gal8:Ub, S:NDP52:Ub:OPTN:p62:N/S, S:Gal8:NDP52:Ub:OPTN:p62:N/S, S:Gal8:Ub:OPTN, S:NDP52:Ub:OPTN:p62, S:Gal8:NDP52:Ub:OPTN:p62, S:Ub:OPTN, Ap:Gal8:Ub:OPTNp, S:Ub:p62, S:Ub:NDP52, S:Gal8:NDP52:Ub:p62:OPTNp:N/S:OligoTBK1, S:Ub:NDP52:N/S, S:Gal8:NDP52:Ub:OPTN:p62:N/S:diTBK1, S:Gal8:NDP52:Ub:OPTN:p62:N/S:diTBK1i, Ap:Gal8:Ub:N/S, Ap:Gal8:Ub, S:Gal8:Ub:NDP52:N/S, S:Ub</p>    | Conservation of LRSAM1                   |
| PI7 (27) | <p>Ap:Ub, S:NDP52:Ub:OPTN:p62:N/S:OligoTBK1, S:NDP52:Ub:OPTN:p62:N/S:diTBK1i, S:NDP52:Ub:OPTN:p62:N/S:diTBK1, E3 ligase, S:Gal8:Ub:NDP52, S:Gal8:Ub:p62, Ap:Ub:OPTNp, Ap:Ub:N/S, S:Gal8:Ub, S:NDP52:Ub:OPTN:p62:N/S, S:Gal8:NDP52:Ub:OPTN:p62:N/S, S:Gal8:Ub:OPTN, S:NDP52:Ub:OPTN:p62, S:Gal8:NDP52:Ub:OPTN:p62, S:Ub:OPTN, Ap:Gal8:Ub:OPTNp, S:Ub:p62, S:Ub:NDP52, S:Gal8:NDP52:Ub:p62:OPTNp:N/S:OligoTBK1, S:Ub:NDP52:N/S, S:Gal8:NDP52:Ub:OPTN:p62:N/S:diTBK1, S:Gal8:NDP52:Ub:OPTN:p62:N/S:diTBK1i, Ap:Gal8:Ub:N/S, Ap:Gal8:Ub, S:Gal8:Ub:NDP52:N/S, S:Ub</p> | Conservation of ubiquitin                |
| PI8 (4)  | SignalAutophagyInduction, AA, ULK1comp, AAstarvation                                                                                                                                                                                                                                                                                                                                                                                                                                                                                                               | Conservation of the AA starvation signal |
| PI9 (21) | <p>Ap:Ub, Ap:Gal8:Ub:OPTNp, S:NDP52:Ub:OPTN:p62:N/S:OligoTBK1, S:Ub:p62, S:NDP52:Ub:OPTN:p62:N/S:diTBK1i, S:NDP52:Ub:OPTN:p62:N/S:diTBK1, S:Gal8:Ub:p62, p62', S:Gal8:NDP52:Ub:p62:OPTNp:N/S:OligoTBK1, Ap:Ub:OPTNp, Ap:Ub:N/S, S:Gal8:NDP52:Ub:OPTN:p62:N/S:diTBK1, S:Gal8:NDP52:Ub:OPTN:p62:N/S, S:NDP52:Ub:OPTN:p62:N/S, p62'i, S:NDP52:Ub:OPTN:p62, S:Gal8:NDP52:Ub:OPTN:p62, S:Gal8:NDP52:Ub:OPTN:p62:N/S:diTBK1i, Ap:Gal8:Ub:N/S, Ap:Gal8:Ub, p62 Conservation of p62</p>                                                                                    |                                          |
| PI10 (6) | SCV, SignalAutophagyInduction, mTORC1:ULK1comp:SCV, SignalSCVdamage, ULK1comp, AAstarvation                                                                                                                                                                                                                                                                                                                                                                                                                                                                        | Conservation of the SCV damage signal    |

|           |                                                                                                                                                                                                                                                                                                                                                                                                                                                                                                                                                                                                                                                                          |                                                             |
|-----------|--------------------------------------------------------------------------------------------------------------------------------------------------------------------------------------------------------------------------------------------------------------------------------------------------------------------------------------------------------------------------------------------------------------------------------------------------------------------------------------------------------------------------------------------------------------------------------------------------------------------------------------------------------------------------|-------------------------------------------------------------|
| PI11 (17) | <p>Ap:Gal8:Ub:OPTNp, S:NDP52:Ub:OPTN:p62:N/S:OligoTBK1,<br/> S:NDP52:Ub:OPTN:p62:N/S:diTBK1i,<br/> S:NDP52:Ub:OPTN:p62:N/S:diTBK1,<br/> S:Gal8:NDP52:Ub:p62:OPTNp:N/S-OligoTBK1,<br/> Ap:Ub:OPTNp, Ap:Ub:N/S, S:Ub:NDP52:N/S,<br/> S:Gal8:NDP52:Ub:OPTN:p62:N/S:diTBK1,<br/> N/S'i, S:Gal8:NDP52:Ub:OPTN:p62:N/S,<br/> S:NDP52:Ub:OPTN:p62:N/S, N/S,<br/> S:Gal8:NDP52:Ub:OPTN:p62:N/S:diTBK1i, Ap:Gal8:Ub:N/S,<br/> S:Gal8:Ub:NDP52:N/S, N/S'</p>                                                                                                                                                                                                                       | <p>Conservation<br/> of<br/> Nap1/Sintbad</p>               |
| PI12 (3)  | <p>mTORC1:ULK1comp:SCV, mTORC1:ULK1comp,<br/> mTORC1inactive</p>                                                                                                                                                                                                                                                                                                                                                                                                                                                                                                                                                                                                         | <p>Conservation<br/> of mTORC1</p>                          |
| PI13 (32) | <p>SCV, Ap:Ub, S:NDP52:Ub:OPTN:p62:N/S:OligoTBK1, S-<br/> cyt, S-damagedSCV, S:NDP52:Ub:OPTN:p62:N/S:diTBK1i,<br/> S:NDP52:Ub:OPTN:p62:N/S:diTBK1, S:Gal8,<br/> S:Gal8:Ub:NDP52, S:Gal8:Ub:p62, Ap:Ub:OPTNp, Ap:Ub:N/S,<br/> S:Gal8:NDP52, S:Gal8:Ub, S:Gal8:NDP52:Ub:OPTN:p62:N/S,<br/> S:NDP52:Ub:OPTN:p62:N/S, S:Gal8:Ub:OPTN,<br/> S:NDP52:Ub:OPTN:p62, S:Gal8:NDP52:Ub:OPTN:p62,<br/> S:Ub:OPTN, Ap:Gal8:Ub:OPTNp, S:Ub:p62, S:Ub:NDP52,<br/> Ap:Gal8, S:Gal8:NDP52:Ub:p62:OPTNp:N/S:OligoTBK1,<br/> S:Ub:NDP52:N/S, S:Gal8:NDP52:Ub:OPTN:p62:N/S:diTBK1,<br/> S:Gal8:NDP52:Ub:OPTN:p62:N/S:diTBK1i, Ap:Gal8:Ub:N/S,<br/> Ap:Gal8:Ub, S:Gal8:Ub:NDP52:N/S, S:Ub</p> | <p>Conservation<br/> of<br/> <i>Salmonella</i></p>          |
| PI14 (35) | <p>4*Ap:Gal8:Ub:OPTNp, 4*S:NDP52:Ub:OPTN:p62:N/S:<br/> OligoTBK1, 2*diTBK1'iii, 2*diTBK1'ii,<br/> 2*S:NDP52:Ub:OPTN:p62:N/S:diTBK1i,<br/> 2*S:NDP52:Ub:OPTN:p62:N/S:diTBK1, TBK1<br/> 4*S:Gal8:NDP52:Ub:p62:OPTNp:N/S:OligoTBK1,<br/> 4*Ap:Ub:OPTNp, 2*S:Gal8:NDP52:Ub:OPTN:p62:N/S:diTBK1,<br/> 2*diTBK1', 2*diTBK1'i, 2*S:Gal8:NDP52:Ub:OPTN:p62:N/S:<br/> diTBK1i</p>                                                                                                                                                                                                                                                                                                 | <p>Conservation<br/> of TBK1</p>                            |
| PI15 (5)  | <p>SCV, mTORC1:ULK1comp:SCV, SignalSCVdamage,<br/> mTORC1inactive, AAstarvation</p>                                                                                                                                                                                                                                                                                                                                                                                                                                                                                                                                                                                      | <p>Conservation<br/> of the SCV<br/> damage<br/> signal</p> |
