# Supplementary material for: In Silico Knockout Studies of Xenophagic Capturing of Salmonella
Source: PubMed Central journal article supplement (PMC5131900; doi:10.1371/journal.pcbi.1005200), 2016-12-01
Supplement: pcbi.1005200.s011.pdf [file pcbi.1005200.s011.pdf]

**S5 Table: Single knockout and its impact on *Salmonella* xenophagy.**

| Single knockout  | Number of affected T-invariants | Percentage of affected T-invariants |
|------------------|---------------------------------|-------------------------------------|
| NDP52            | 16                              | 100%                                |
| Ubiquitin/LRSAM1 | 15                              | 94%                                 |
| p62              | 15                              | 94%                                 |
| OPTN             | 15                              | 94%                                 |
| Nap1/Sintbad     | 12                              | 75%                                 |
| Galectin-8       | 11                              | 69%                                 |
| TBK1             | 6                               | 38%                                 |
