# Supplementary material for: In Silico Knockout Studies of Xenophagic Capturing of Salmonella
Source: PubMed Central journal article supplement (PMC5131900; doi:10.1371/journal.pcbi.1005200), 2016-12-01
Supplement: pcbi.1005200.s012.pdf [file pcbi.1005200.s012.pdf]

**S6 Table: Double knockout and its impact on *Salmonella* xenophagy.**

| Double knockout                | Number of affected T-invariants | Percentage of affected T-invariants |
|--------------------------------|---------------------------------|-------------------------------------|
| Galectin-8, Ubiquitin/LRSAM1   | 16                              | 100%                                |
| Galectin-8, p62                | 16                              | 100%                                |
| Galectin-8, NDP52              | 16                              | 100%                                |
| Galectin-8, OPTN               | 16                              | 100%                                |
| Ubiquitin/LRSAM1, NDP52        | 16                              | 100%                                |
| p62, NDP52                     | 16                              | 100%                                |
| NDP52, OPTN                    | 16                              | 100%                                |
| NDP52, Nap1/Sintbad            | 16                              | 100%                                |
| NDP52, TBK1                    | 16                              | 100%                                |
| Ubiquitin/LRSAM1, p62          | 15                              | 94%                                 |
| Ubiquitin/LRSAM1, OPTN         | 15                              | 94%                                 |
| Ubiquitin/LRSAM1, Nap1/Sintbad | 15                              | 94%                                 |
| Ubiquitin/LRSAM1, TBK1         | 15                              | 94%                                 |
| p62, OPTN                      | 15                              | 94%                                 |
| p62, Nap1/Sintbad              | 15                              | 94%                                 |
| p62, TBK1                      | 15                              | 94%                                 |
| OPTN, Nap1/Sintbad             | 15                              | 94%                                 |
| OPTN, TBK1                     | 15                              | 94%                                 |
| Galectin-8, Nap1/Sintbad       | 15                              | 94%                                 |
| Galectin-8, TBK1               | 13                              | 81%                                 |
| Nap1/Sintbad, TBK1             | 12                              | 75%                                 |
